# Supplementary material
Source: HighWire-hosted journal article supplement (http://www.cmaj.ca/highwire/filestream/58494/field_highwire_adjunct_files/0/pg747.pdf)
Supplement: pg747.pdf [file pg747.pdf]

## PRODUCTION

Production Manager • Gestionnaire de la production  
Kathryn A. Freamo

Production Assistants • Assistantes à la production  
Nicole Barbeau, Lianne Johnsen, Carole Lalonde

## ADVERTISING • PUBLICITÉ

Manager, Journal Advertising  
Gestionnaire, Annonces publicitaires  
Beverley Kirkpatrick

Coordinator, Display Advertising  
Coordonnatrice de la publicité  
Nancy Pope

Assistant Manager, Classified Advertising  
Gestionnaire adjointe, annonces classées  
Deborah Rodd

613 731-9331, fax 613 565-7488  
advertising@cma.ca

For information on how to advertise  
in any of the CMA journals  
[www.cma.ca](http://www.cma.ca)

Pour savoir comment placer une annonce  
dans les revues publiées par l'AMC  
[www.cma.ca](http://www.cma.ca)

Marketing and Advertising Sales  
Marketing et publicité  
Keith Health Care Inc.

|                  |                  |
|------------------|------------------|
| <b>Toronto</b>   | <b>Montréal</b>  |
| 905 278-6700     | 514 624-6979     |
| 800 661-5004     | 877 761-0447     |
| fax 905 278-4850 | fax 514 624-6707 |

All prescription drug advertisements have been cleared by the Pharmaceutical Advertising Advisory Board.

Toutes les annonces de médicaments prescrits ont été approuvées par le Conseil consultatif de publicité pharmaceutique.

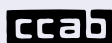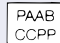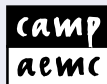

ASSOCIATION  
MÉDICALE  
CANADIENNE

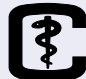

CANADIAN  
MEDICAL  
ASSOCIATION

President • Président  
Hugh Scully

Secretary General • Secrétaire général  
Peter W. Vaughan

Director, Publications  
Directeur, Publications  
R. Peter Milroy

Manager, Publishing Services  
Gestionnaire, Services de publication  
Jill Rafuse

Publications Committee • Comité des publications  
Stuart M. MacLeod (Chairman • Président)

Henry Haddad  
Philip F. Hall  
Barbara P. Lent  
D'Arcy Lawrence Little  
Jonathan L. Meakins  
Mark Roper  
W. Grant Thompson

Permissions • Permissions  
[pubs@cma.ca](http://pubs@cma.ca)

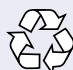

## Table des matières du 21 mars 2000

### Le seul problème vraiment sérieux

De 1990 à 1994, le suicide a été la deuxième cause de décès chez les membres du personnel actif de l'Armée de l'air des États-Unis (USAF) et a représenté 23 % du total des décès survenus dans cette population.<sup>1</sup> En 1996, l'Armée de l'air américaine a mis en œuvre une stratégie intégrée de prévention du suicide qui traitait le suicide comme un problème non seulement médical, mais aussi communautaire. La stratégie a mis l'accent sur l'intervention rapide et sur des facteurs de protection comme les réseaux d'entraide, un sentiment d'appartenance, des techniques d'adaptation et des comportements de recherche d'aide. De 1994 à 1998, le taux de suicide a dégringolé pour tomber de 16,4 à 9,4 suicides pour 100 000 membres de l'effectif et le taux estimatif pour 1999 s'établissait à 2,2 pour 100 000. Les taux de suicide dans les autres branches des forces armées n'ont pas baissé régulièrement au cours de la même période, ce qui indique que la stratégie de l'Armée de l'air américaine était efficace.

L'idée selon laquelle l'incidence du suicide pourrait refléter divers degrés d'intégration sociale a été lancée pour la première fois par Emile Durkheim dans *Suicide* (1897). Il a élaboré une typologie du suicide «égoïste», «anémique» et «altruiste», qui a eu de l'influence. On lui a reproché par la suite d'expliquer le suicide en se fondant sur des corrélations sociales seulement et de ne pas avoir tenu compte de motivations personnelles à l'égard de ce que Camus appelait «le seul problème philosophique vraiment sérieux».

Pour les tenants du modèle médical, l'idéation relative au suicide ne représente pas, comme Camus le soutiendrait, l'expression raisonnée de la libre volonté : il s'agit plutôt d'une maladie neurochimique provoquée par les milieux génétique, biochimique et social du patient. Même si l'on s'attend à ce que les médecins traitent la biochimie et s'il convient qu'ils le fassent, on s'attend moins à ce qu'ils aident les patients à établir des liens et des réseaux sociaux, ce qui est difficile pour eux sur le

plan logistique. Une partie de cette responsabilité incombe certainement aux communautés et aux groupes comme la famille, le quartier et, de plus en plus, le milieu de travail — où ces liens devraient se nouer.

Des recherches récentes ont appuyé notre compréhension théorique et empirique du lien entre les réseaux sociaux et l'état de santé.<sup>2</sup> Ces réseaux ont toujours résidé dans le domaine privé de la famille et des amis. Or, comme les hommes et les femmes passent plus d'heures au travail, il incombe aux employeurs de favoriser l'entraide sociale au travail. Une étude longitudinale réalisée récemment sur une cohorte professionnelle a démontré que l'état matrimonial, l'entraide sociale au travail et à l'extérieur et les réseaux sociaux sont des prédicteurs de la probabilité de troubles psychologiques subséquents. Ces résultats étaient semblables chez les hommes et les femmes et n'avaient aucun lien avec l'état psychologique de base. On a établi un lien entre l'appui social important au travail et une réduction des congés de courte durée pour troubles psychiatriques.<sup>3,4</sup>

Par ailleurs, à l'exception des études sur le harcèlement sexuel, les écrits contiennent étonnamment peu de choses sur la prévalence et le coût des abus, du rudoïement et de l'intimidation au travail.<sup>5</sup> Or, de tels conflits existent vraiment au travail. Le moment est peut-être venu pour que la recherche sur la santé mentale porte avant tout sur le milieu de travail et que l'on considère pendant un instant le suicide chez les employés comme le seul problème de santé au travail vraiment sérieux.

#### Références

1. Suicide prevention among active duty air force personnel — United States, 1990–1999. *MMWR* 1999;48:1053–7.
2. House JS, Landis KS, Umberson D. Social relationships and health. *Science* 1988;241:540–5.
3. Fuhrer R, Stansfield SA, Chemali J, Shipley MJ. Gender, social relations and mental health: prospective findings from an occupational cohort. *Soc Sci Med* 1999;48:77–87.
4. Stansfield SA, Fuhrer R, Head J, Ferrie J, Shipley M. Work and psychiatric disorder in the Whitehall II study. *J Psychosom Res* 1997;43:73–81.
5. Keashly L, Trott V, MacLean LM. Abusive behaviour in the workplace: a preliminary investigation. *Violence Vict* 1994;9:341–57.
